# Supplementary material
Source: publisher figshare collection journal article supplement (https://adisjournals.figshare.com/ndownloader/files/31154707)
Supplement: Supplementary file 1 [file 31154707]

## Vosoritide: Adis Evaluation

### Key Points

- A modified recombinant human C-type natriuretic peptide analogue is being developed by BioMarin Pharmaceutical for the treatment of achondroplasia
- Received its first approval on 27 August 2021 in the EU
- Approved for the treatment of achondroplasia in patients aged  $\geq 2$  years whose epiphyses are not closed; the diagnosis of achondroplasia should be confirmed by appropriate genetic testing

### Summary

Vosoritide (VOXZOGO®) is a modified recombinant human C-type natriuretic peptide (CNP) analogue, being developed by BioMarin Pharmaceutical for the treatment of achondroplasia.

Achondroplasia is caused by a gain-of-function mutation in the fibroblast growth factor receptor 3 gene (FGFR3), which is a negative regulator of bone growth. Vosoritide acts to restore chondrogenesis through its binding to natriuretic peptide receptor B (NPR-B), resulting in the inhibition of downstream signalling pathways of the overactive FGFR3 gene.

Vosoritide was approved in August 2021 in the EU for the treatment of achondroplasia in patients aged  $\geq 2$  years whose epiphyses are not closed; the diagnosis of achondroplasia should be confirmed by appropriate genetic testing. The drug is also under regulatory review in the USA for the treatment of achondroplasia and clinical development is underway in several countries.

This summary represents the opinions of the [author/authors]. For a full list of declarations, including funding and author disclosure statements, please see the full text online. © Springer Nature Switzerland AG 2021.
